# Supplementary material
Source: PubMed Central journal article supplement (PMC9054036)
Supplement: NIHMS1786434-supplement-Supplementary_Information.pdf [file NIHMS1786434-supplement-Supplementary_Information.pdf]

BD FACSDiva 8.0.1

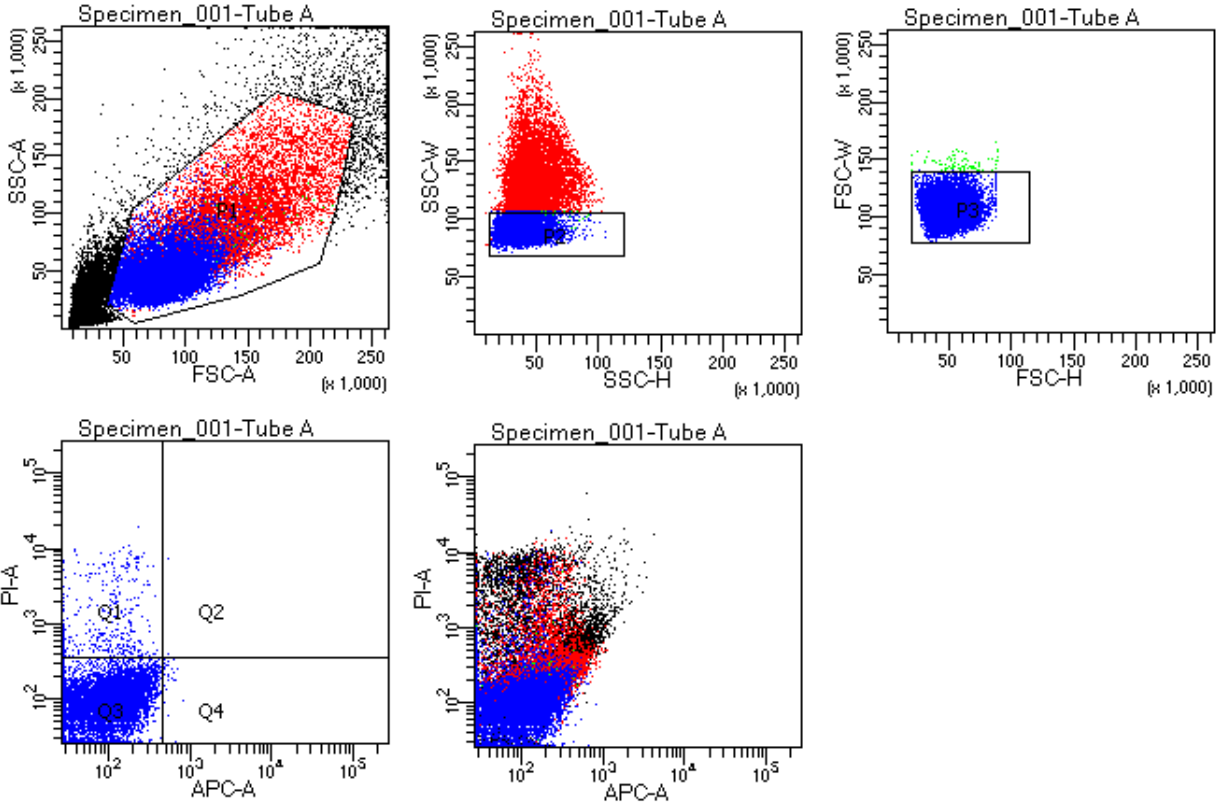

Tube: Tube A

| Population | #Events | %Parent | %Total |
|------------|---------|---------|--------|
| All Events | 34,101  | ###     | 100.0  |
| P1         | 19,149  | 56.2    | 56.2   |
| P2         | 11,133  | 58.1    | 32.6   |
| P3         | 11,043  | 99.2    | 32.4   |
| Q1         | 380     | 3.4     | 1.1    |
| Q2         | 2       | 0.0     | 0.0    |
| Q3         | 10,634  | 96.3    | 31.2   |
| Q4         | 27      | 0.2     | 0.1    |

Supplementary Information

Gating strategy corresponding to the Annexin-V APC assay presented in Figure 1H. Values corresponding to quadrant Q4 (PI-negative, Annexin-V APC-positive) were reported on each graph.
