# Supplementary material
Source: PubMed Central journal article supplement (PMC9054036)

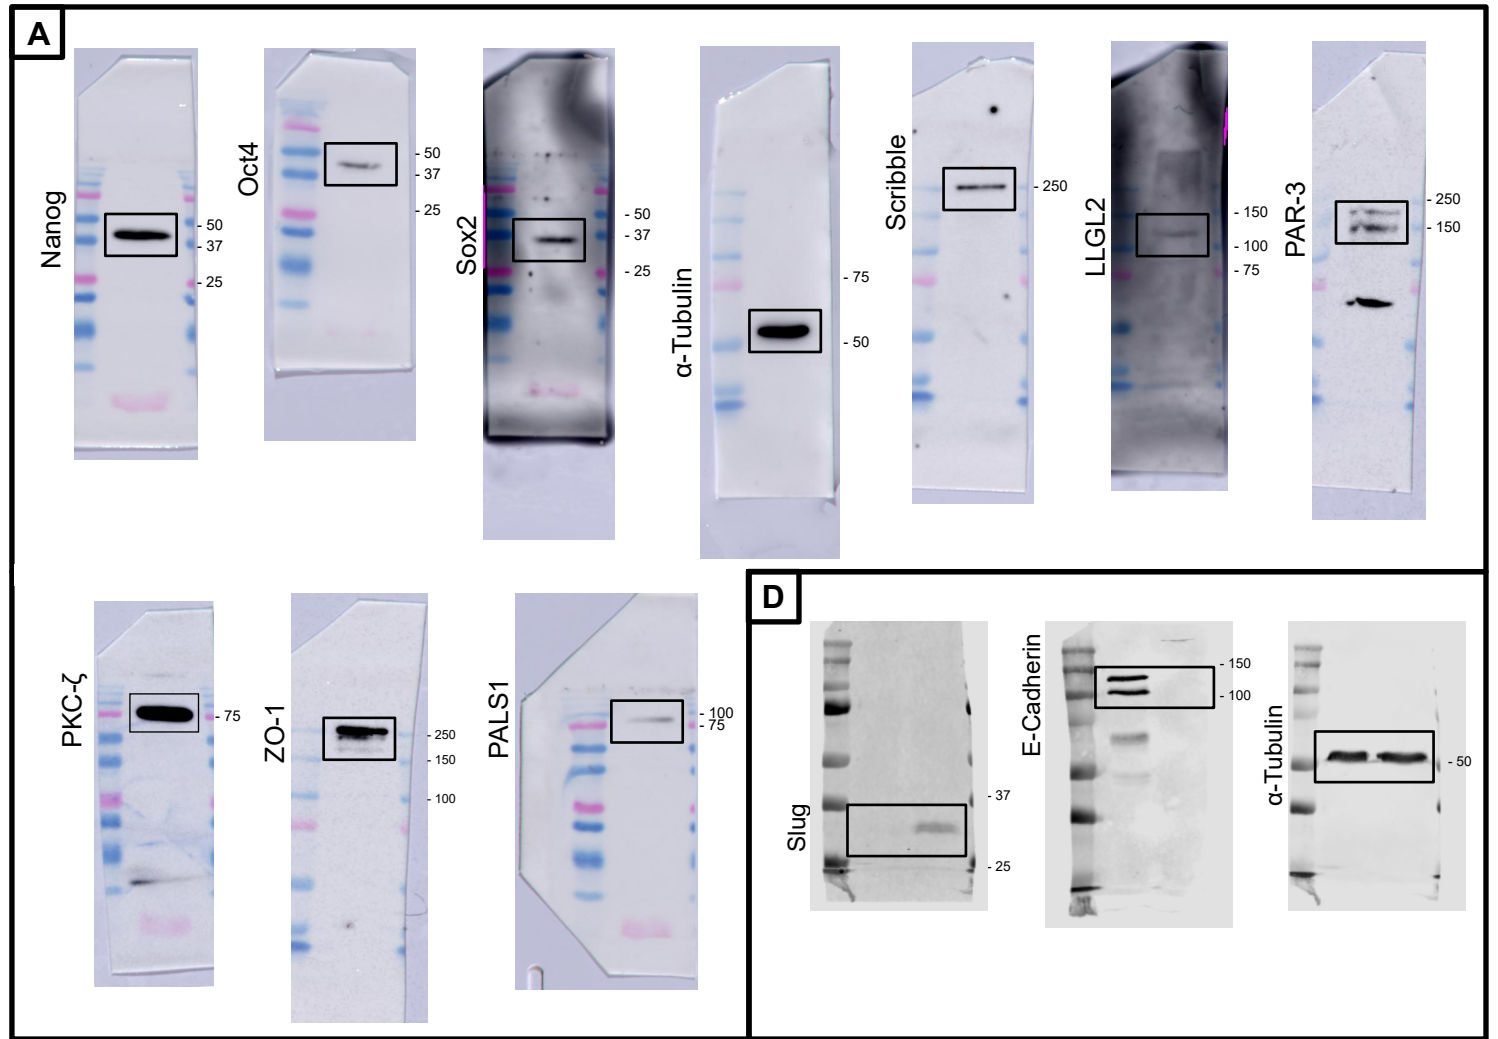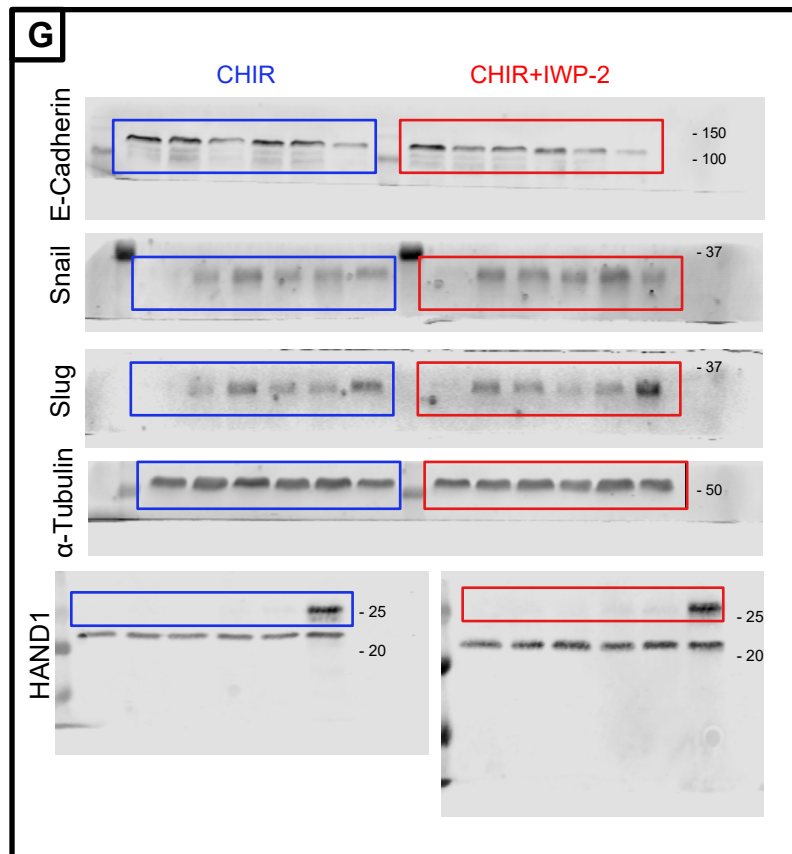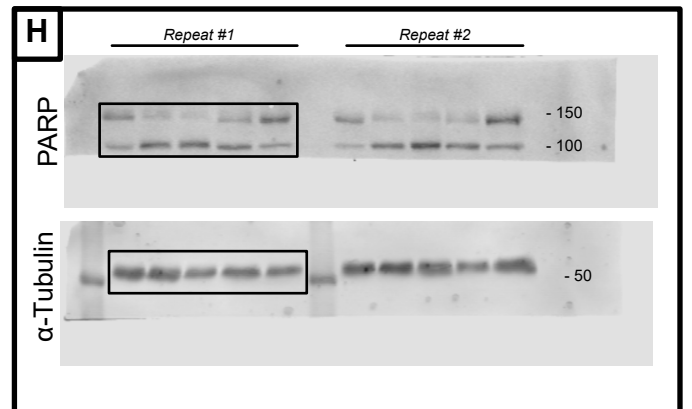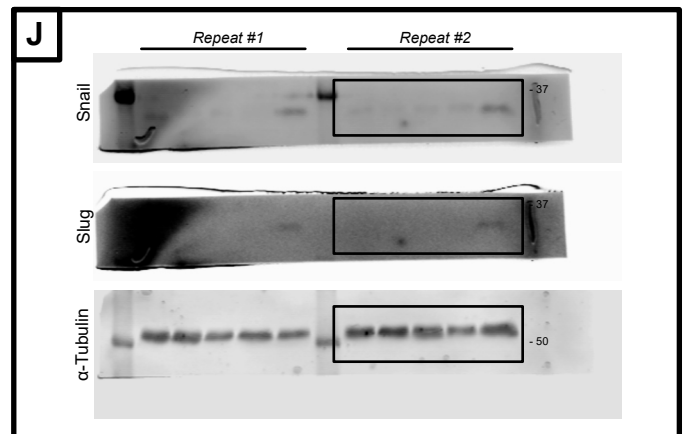

Supplement: NIHMS1786434-supplement-Unprocessed_Blots_-_Extended_Data_1.pdf [file NIHMS1786434-supplement-Unprocessed_Blots_-_Extended_Data_1.pdf]

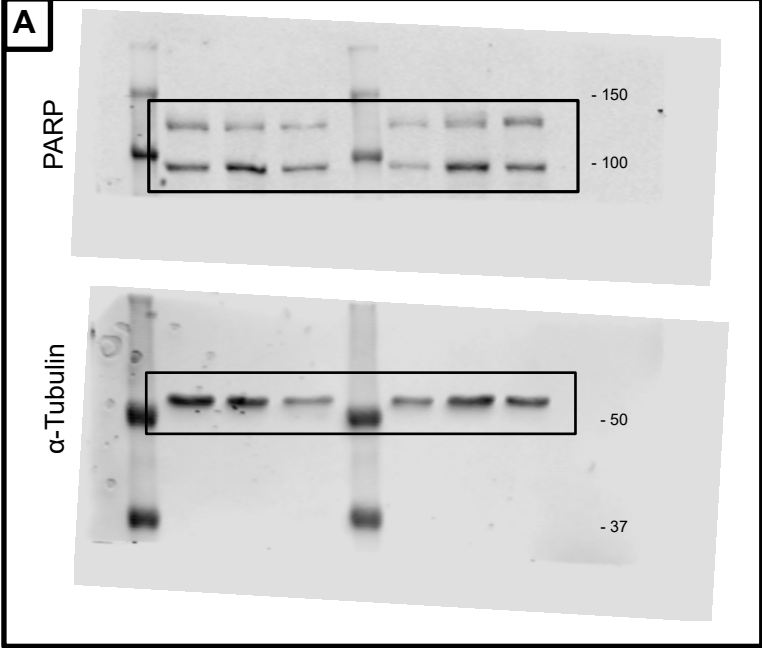

Supplement: NIHMS1786434-supplement-Unprocessed_Blots_-_Extended_Data_2.pdf [file NIHMS1786434-supplement-Unprocessed_Blots_-_Extended_Data_2.pdf]

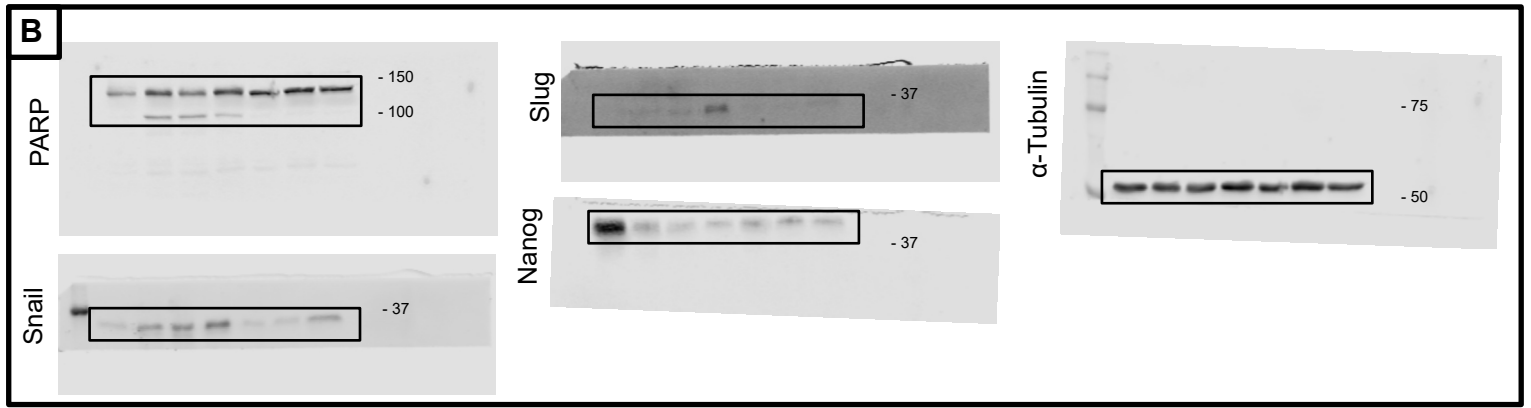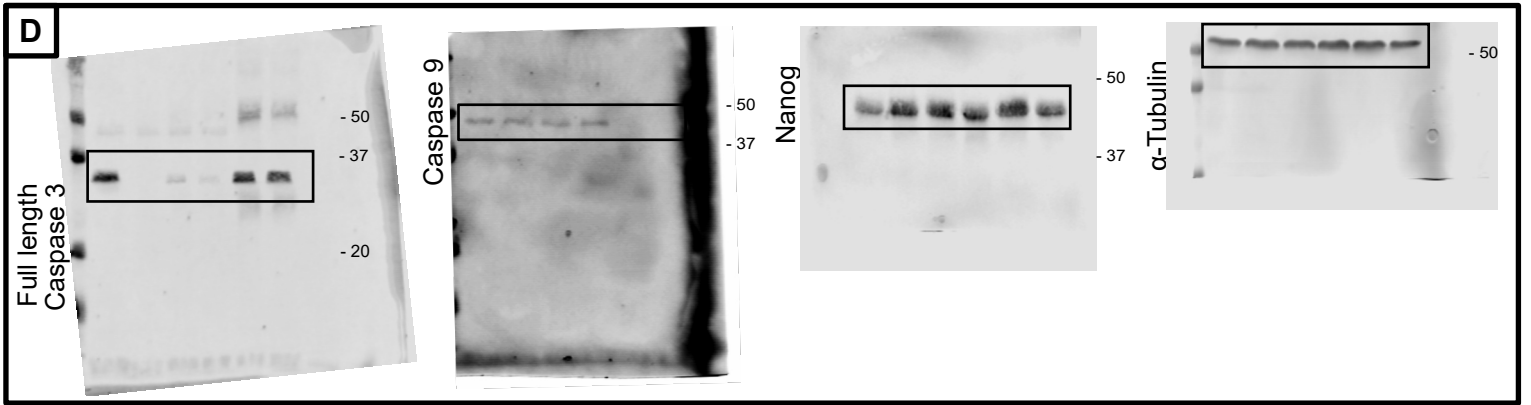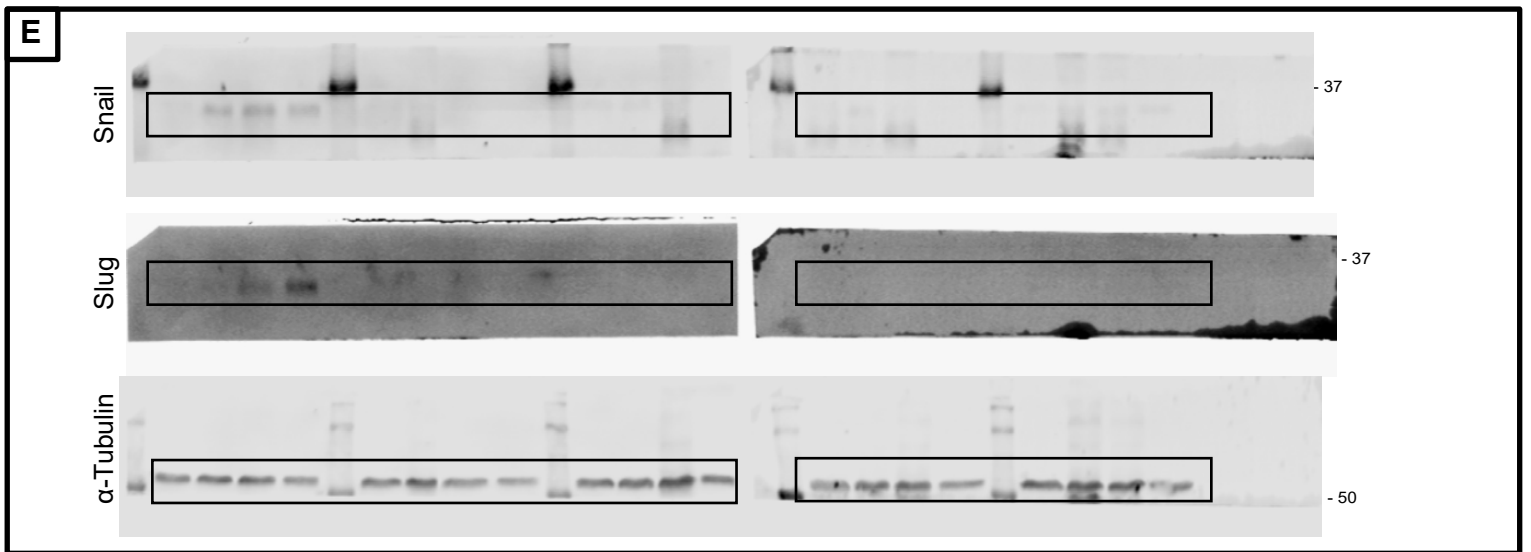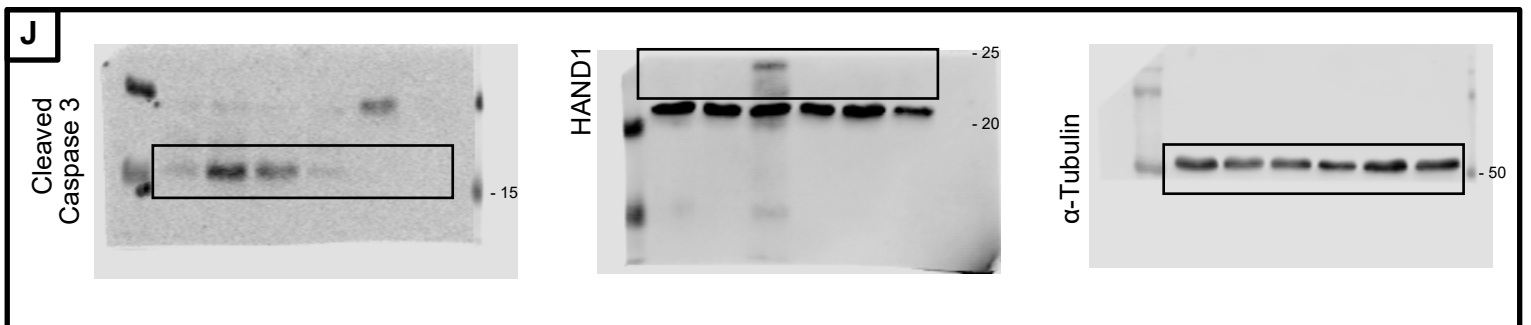

Supplement: NIHMS1786434-supplement-Unprocessed_Blots_-_Extended_Data_4.pdf [file NIHMS1786434-supplement-Unprocessed_Blots_-_Extended_Data_4.pdf]

Source data - WB - Supp. Figure 5

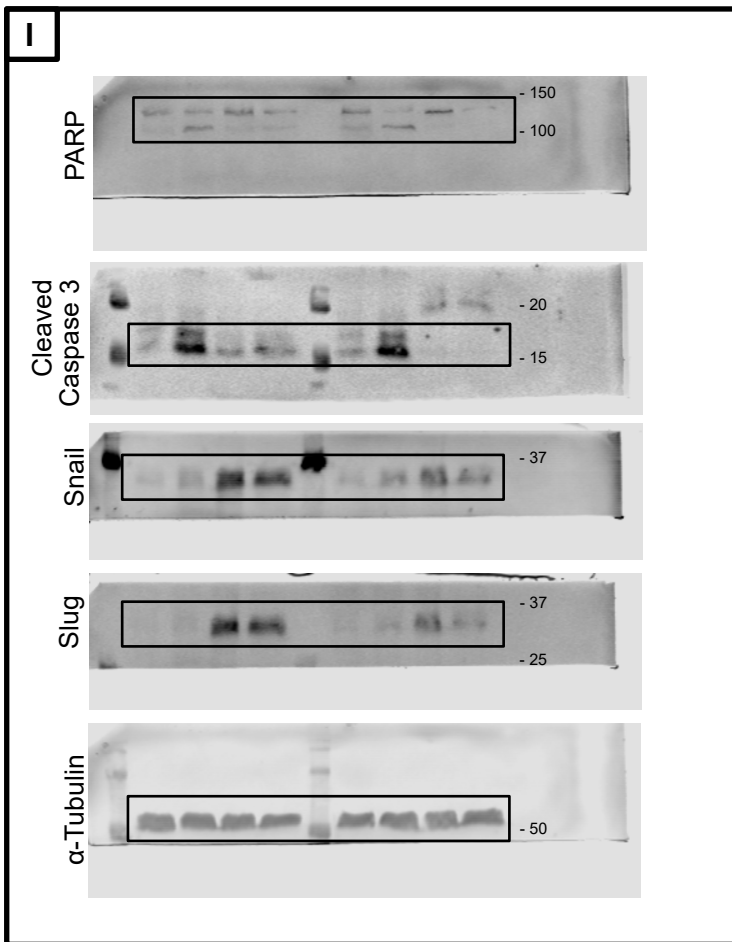

Supplement: NIHMS1786434-supplement-Unprocessed_Blots_-_Extended_Data_5.pdf [file NIHMS1786434-supplement-Unprocessed_Blots_-_Extended_Data_5.pdf]

Source data - WB - Supp. Figure 6

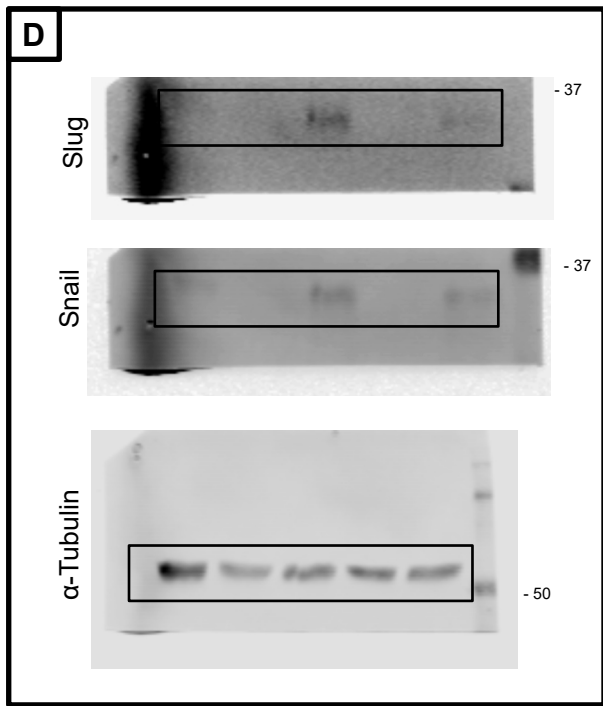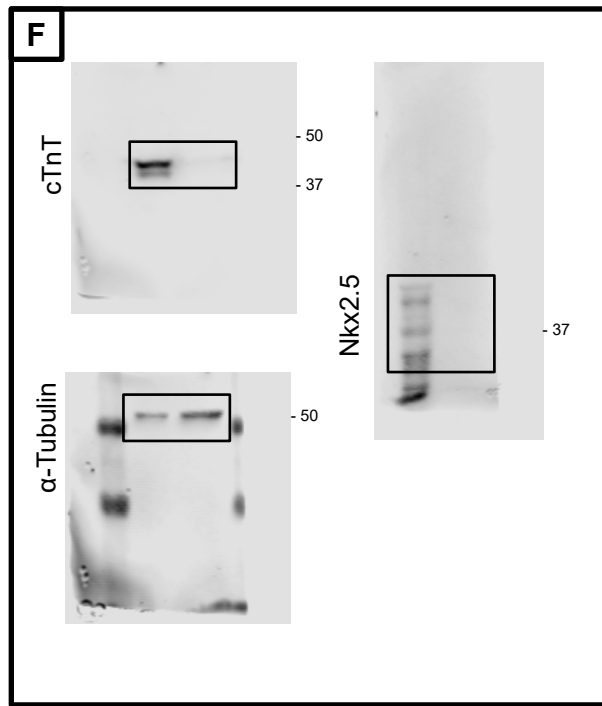

Supplement: NIHMS1786434-supplement-Unprocessed_Blots_-_Extended_Data_6.pdf [file NIHMS1786434-supplement-Unprocessed_Blots_-_Extended_Data_6.pdf]

F

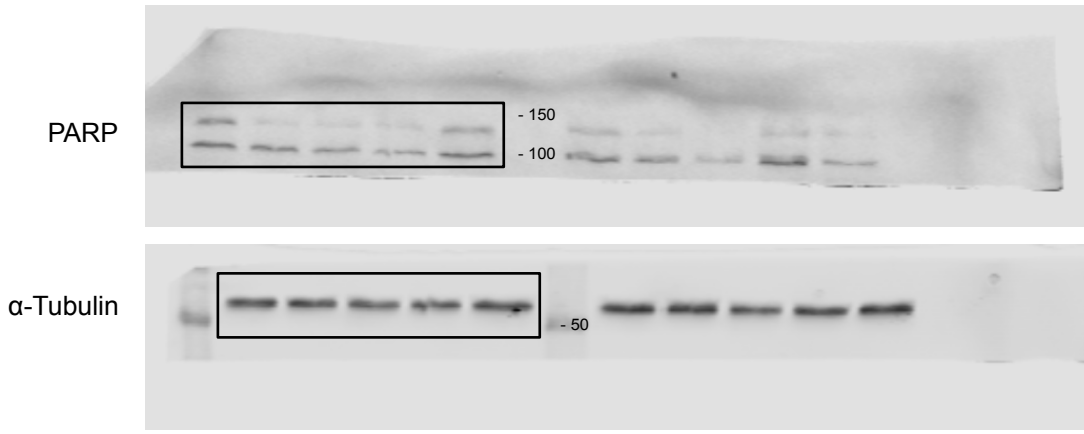

L

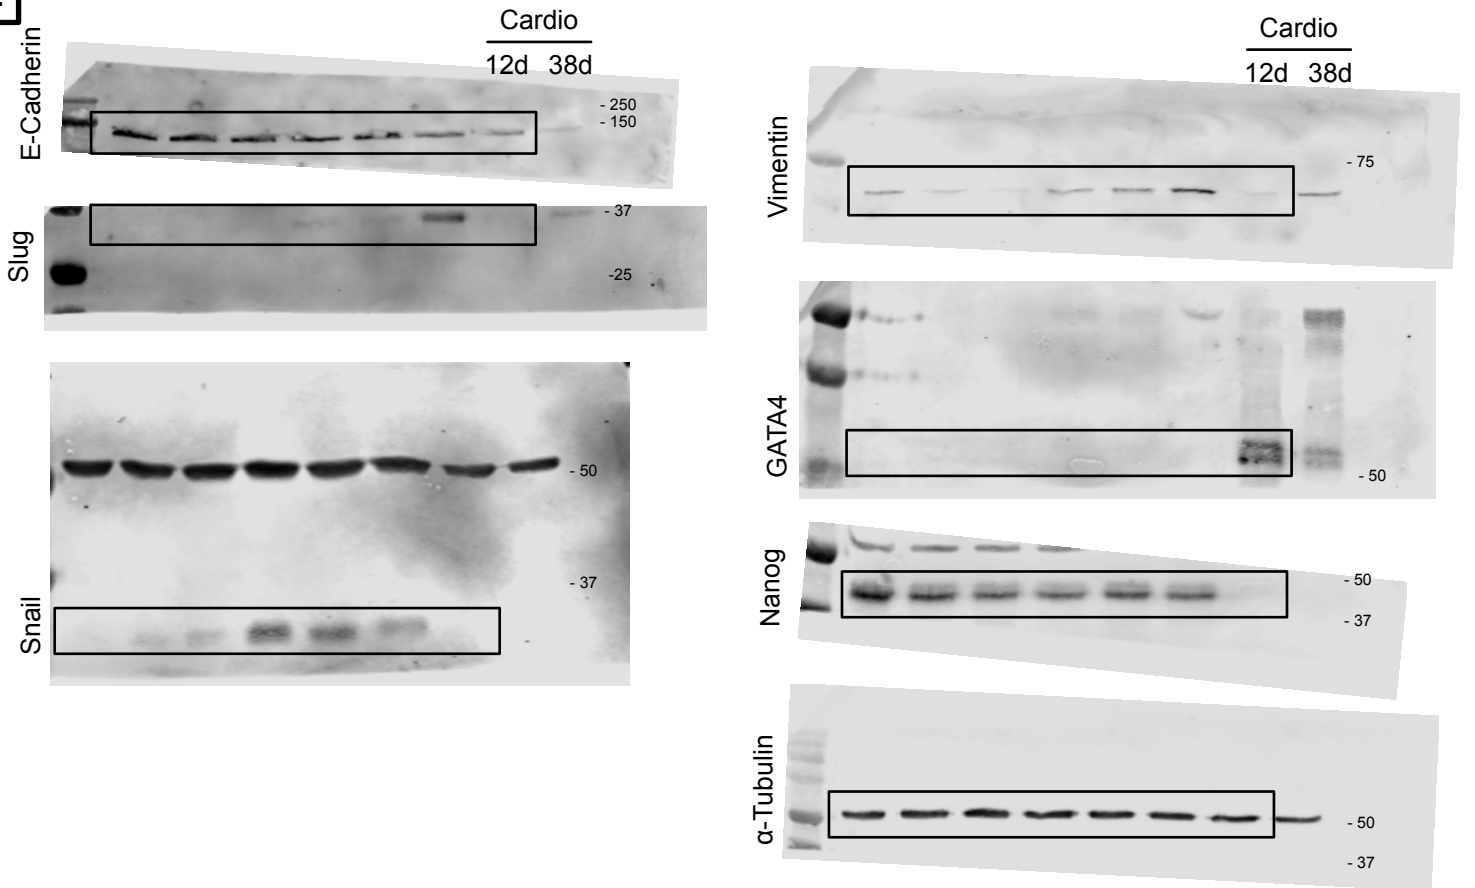

Supplement: NIHMS1786434-supplement-Unprocessed_Blots_-_Figure_1.pdf [file NIHMS1786434-supplement-Unprocessed_Blots_-_Figure_1.pdf]

D

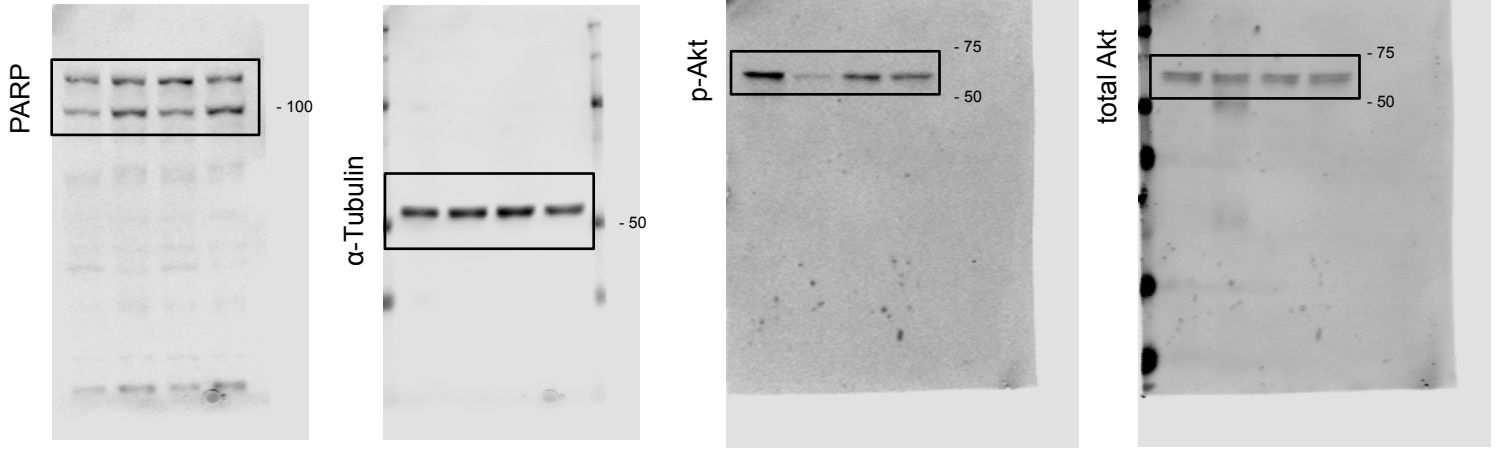

Supplement: NIHMS1786434-supplement-Unprocessed_Blots_-_Figure_2.pdf [file NIHMS1786434-supplement-Unprocessed_Blots_-_Figure_2.pdf]

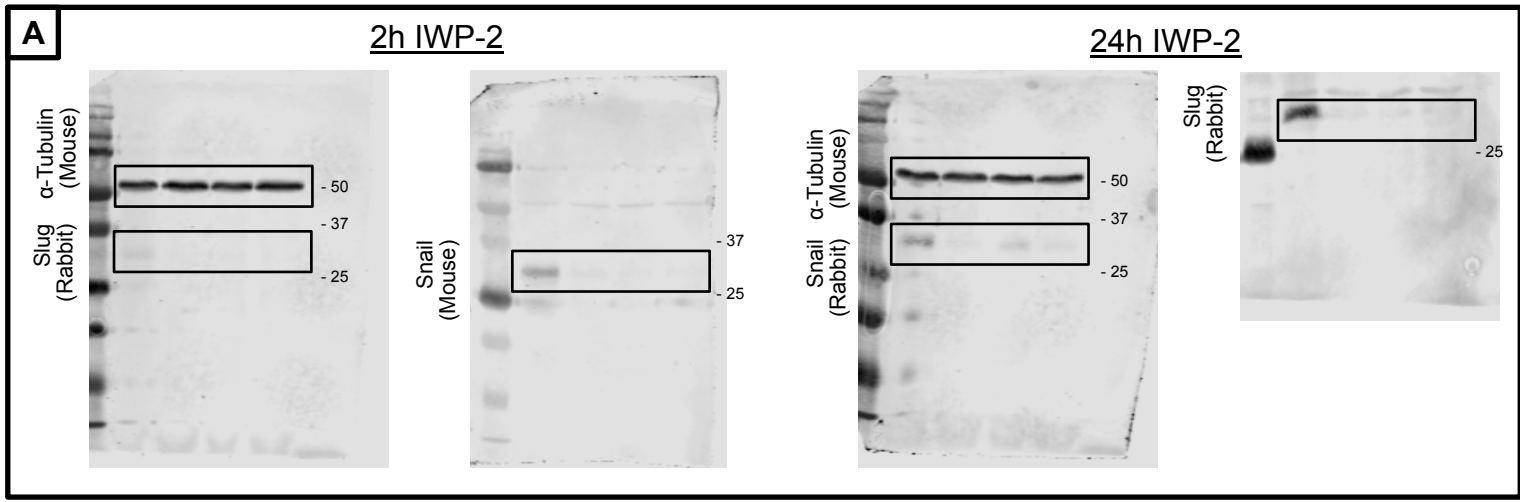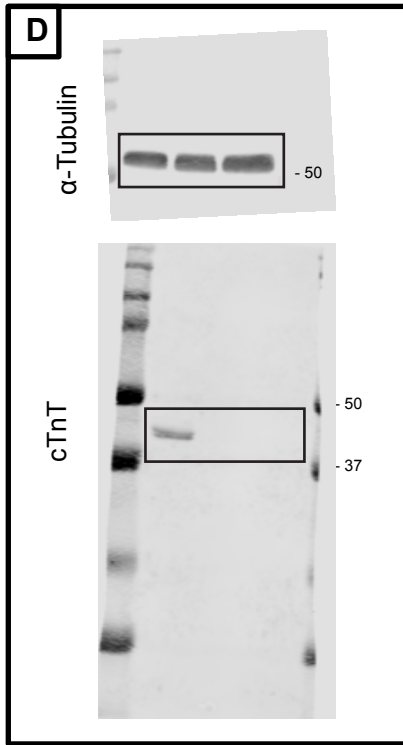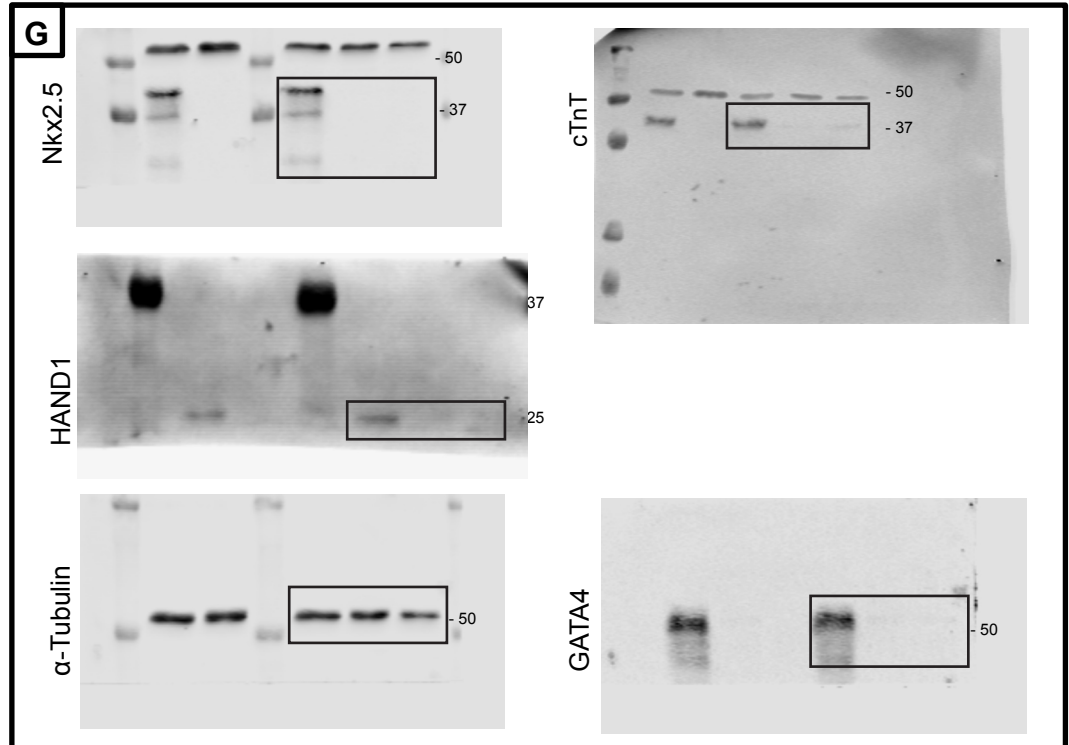

Supplement: NIHMS1786434-supplement-Unprocessed_Blots_-_Figure_3.pdf [file NIHMS1786434-supplement-Unprocessed_Blots_-_Figure_3.pdf]

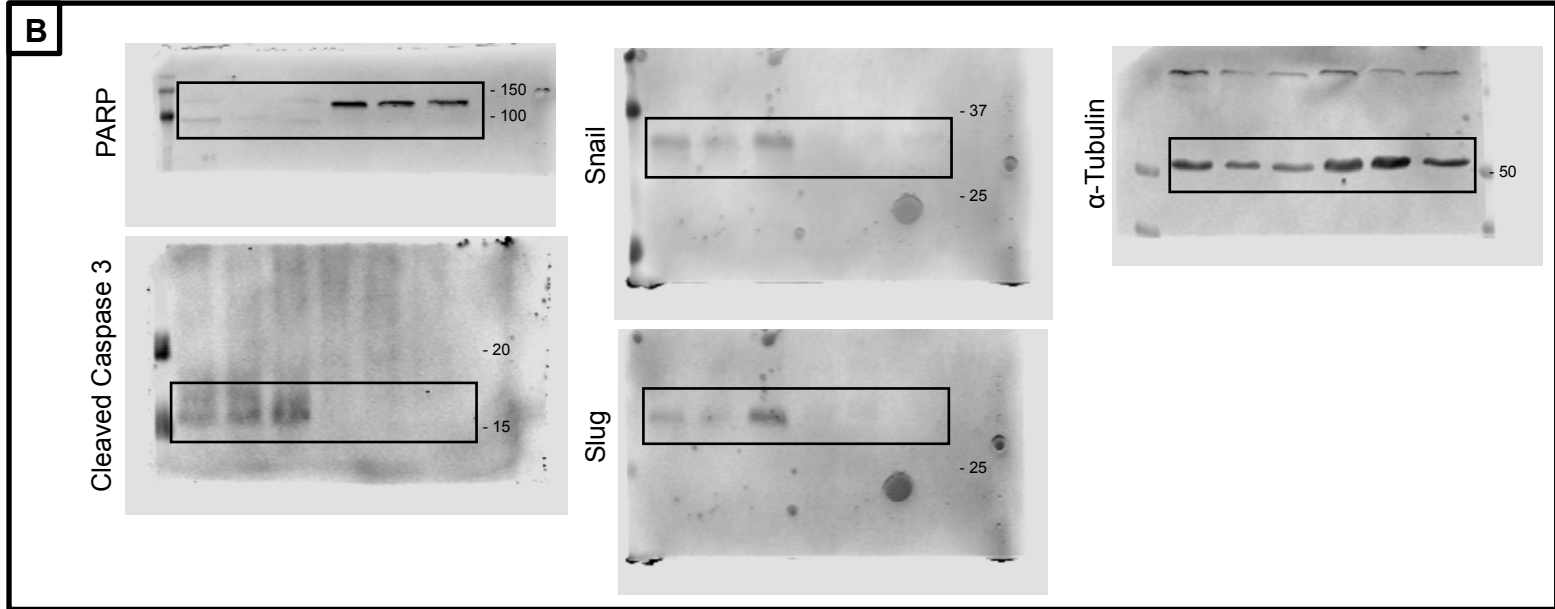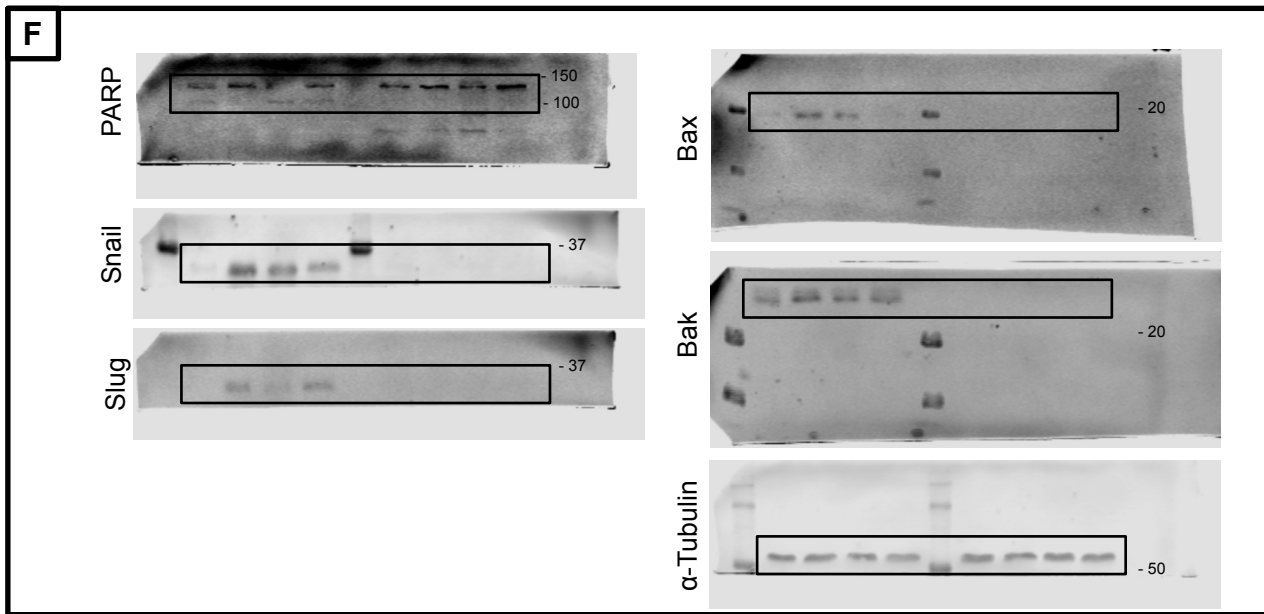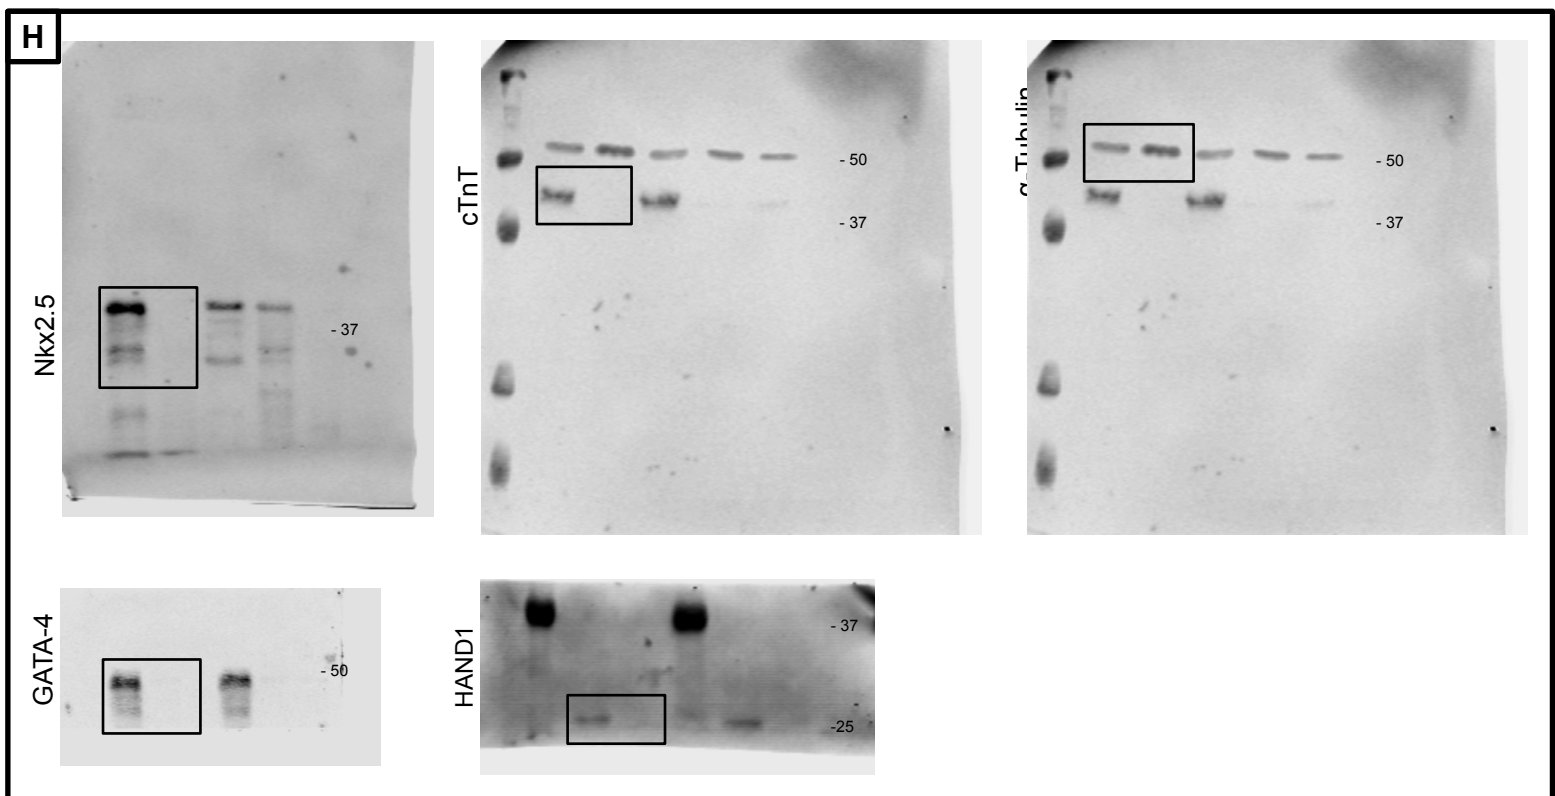

Supplement: NIHMS1786434-supplement-Unprocessed_Blots_-_Figure_4.pdf [file NIHMS1786434-supplement-Unprocessed_Blots_-_Figure_4.pdf]

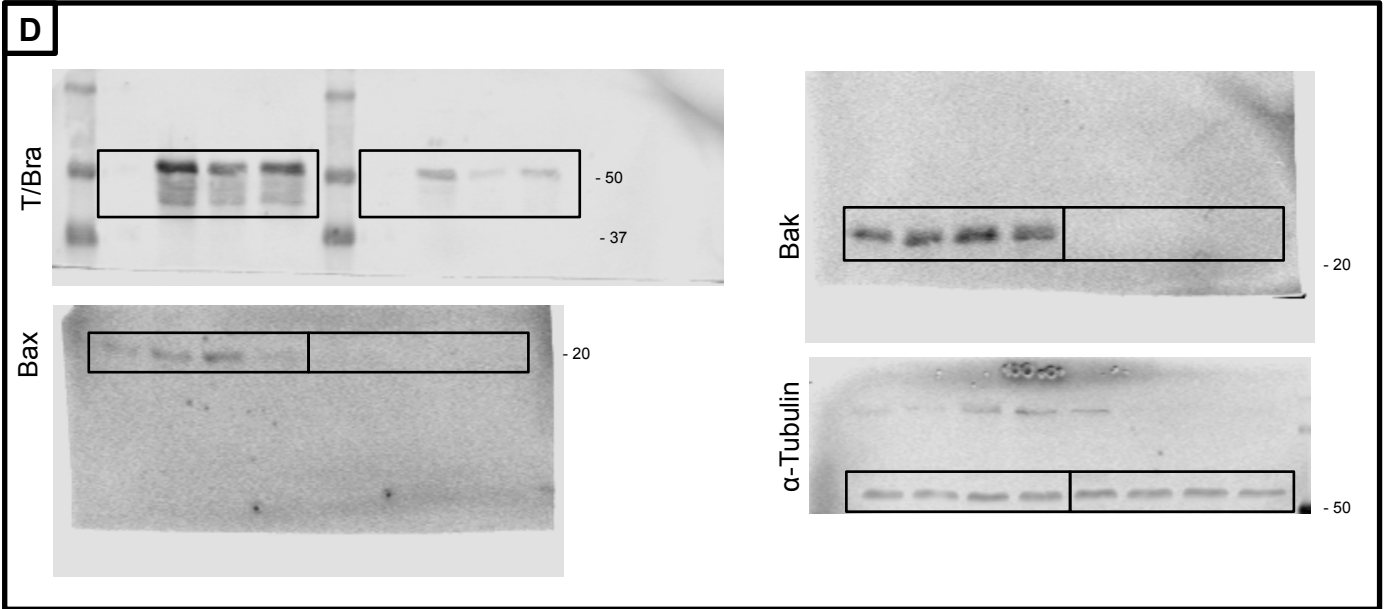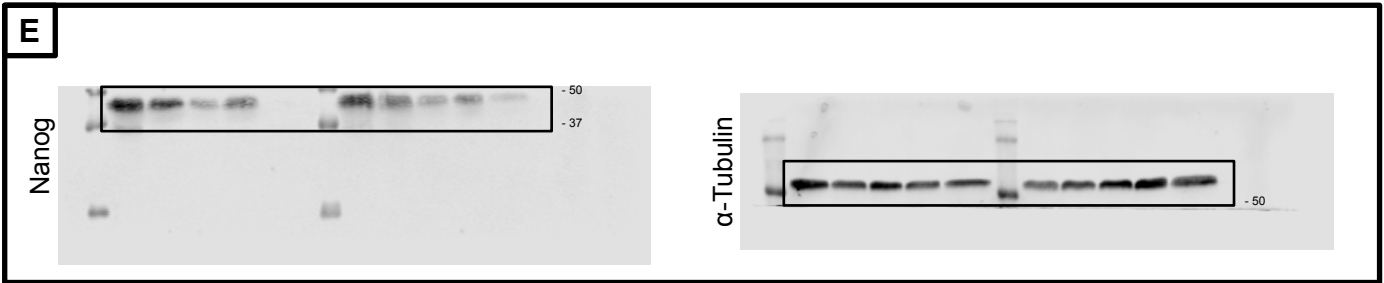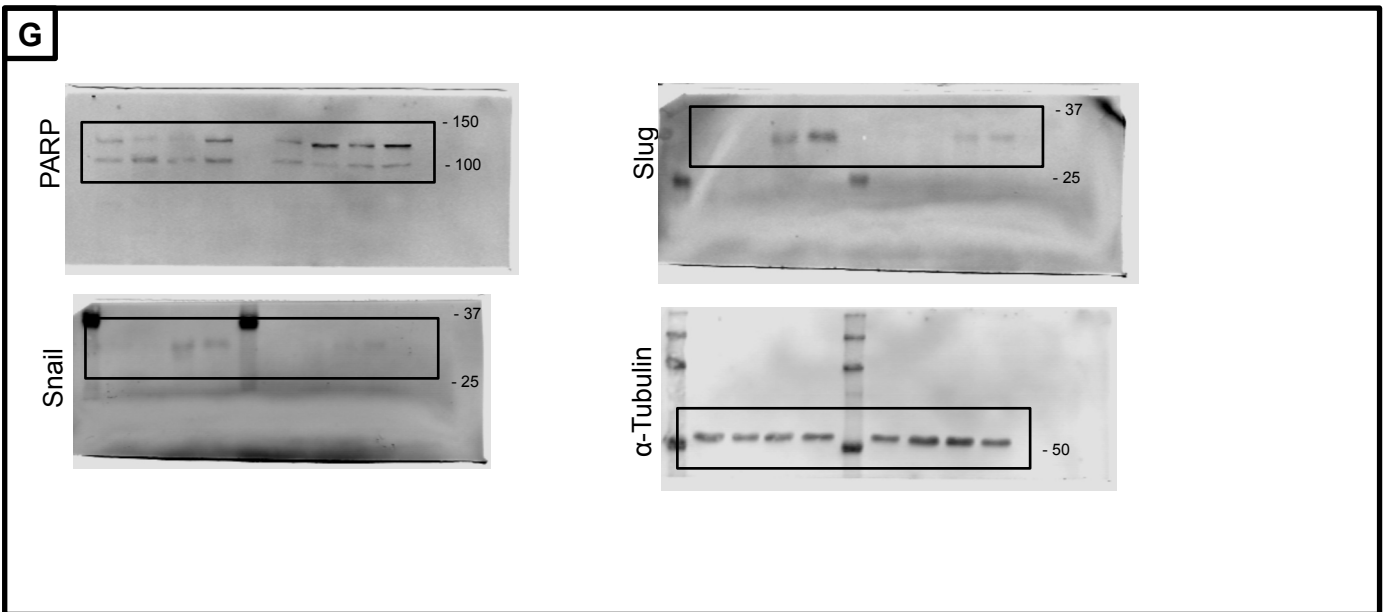

Supplement: NIHMS1786434-supplement-Unprocessed_Blots_-_Figure_5.pdf [file NIHMS1786434-supplement-Unprocessed_Blots_-_Figure_5.pdf]

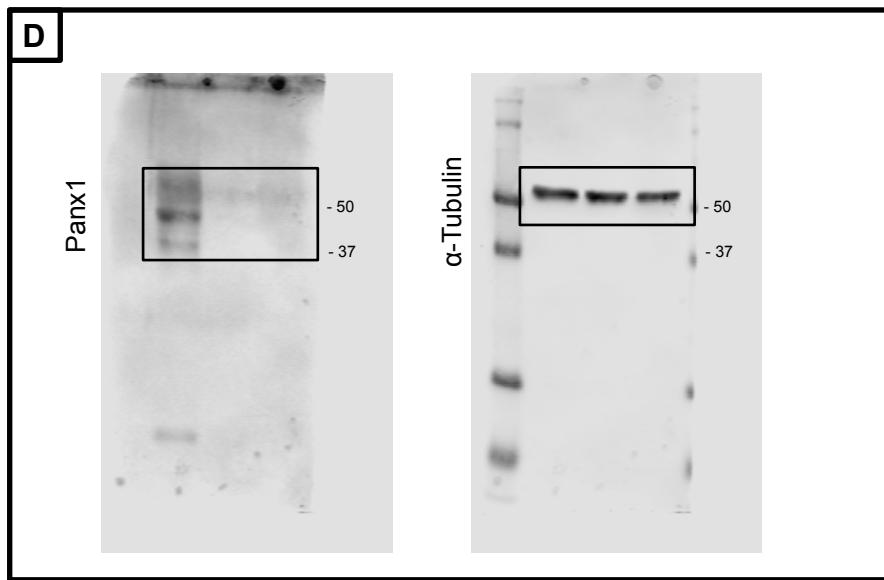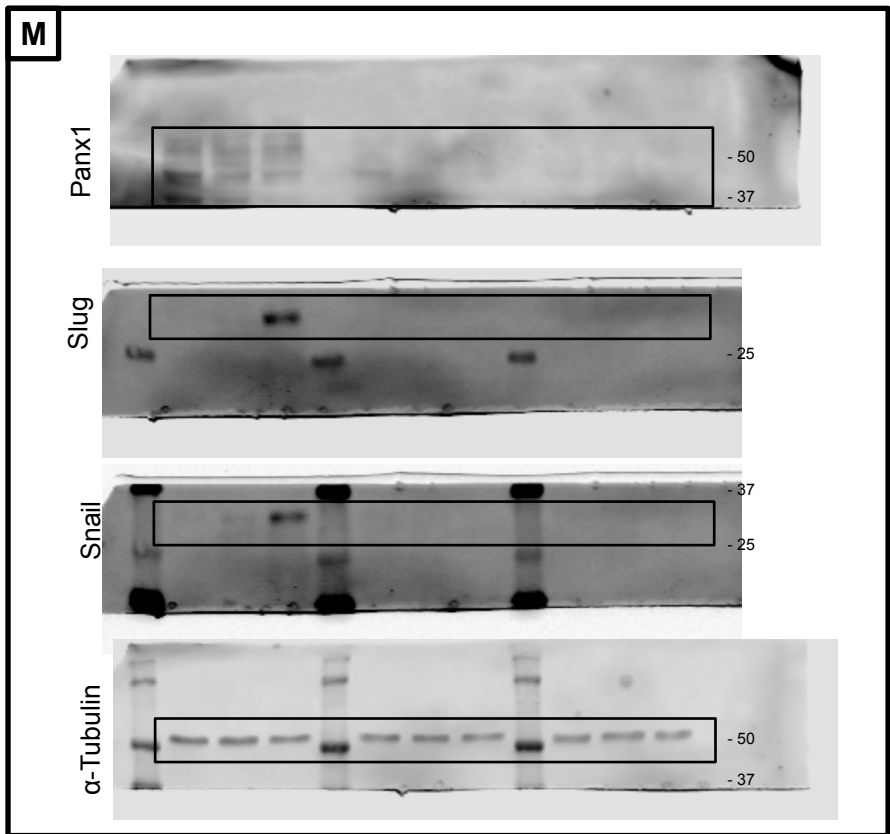

Supplement: NIHMS1786434-supplement-Unprocessed_Blots_-_Figure_6.pdf [file NIHMS1786434-supplement-Unprocessed_Blots_-_Figure_6.pdf]

Source data - WB - Figure 7

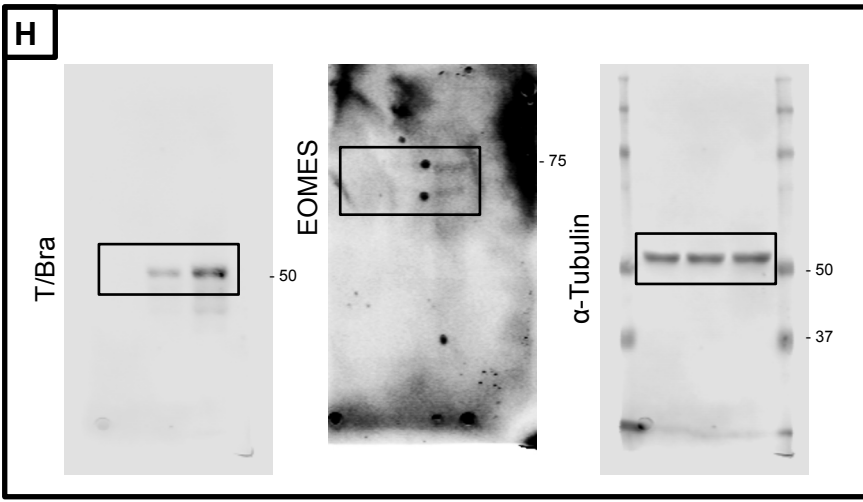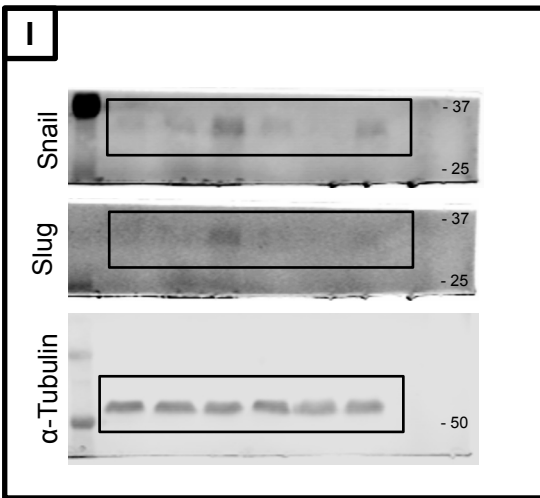

Supplement: NIHMS1786434-supplement-Unprocessed_Blots_-_Figure_7.pdf [file NIHMS1786434-supplement-Unprocessed_Blots_-_Figure_7.pdf]

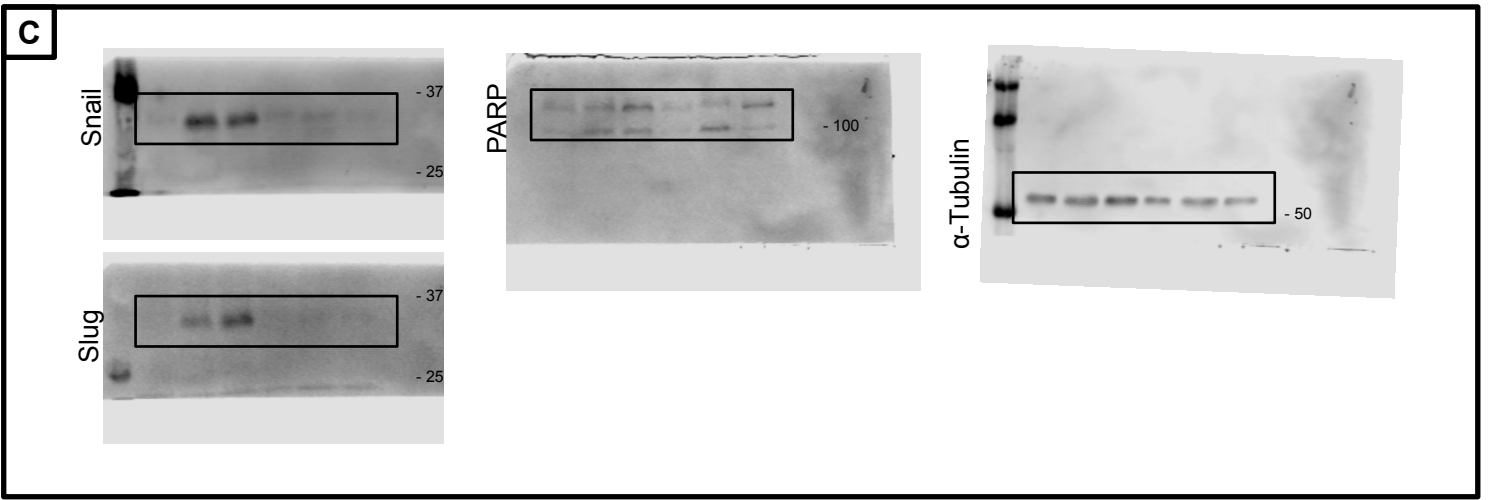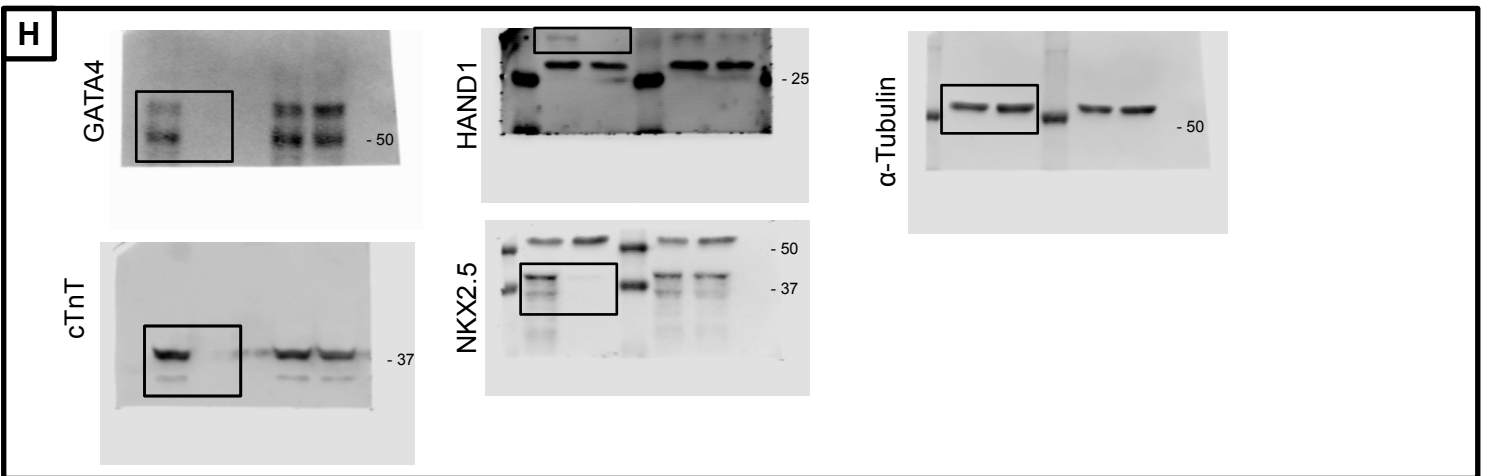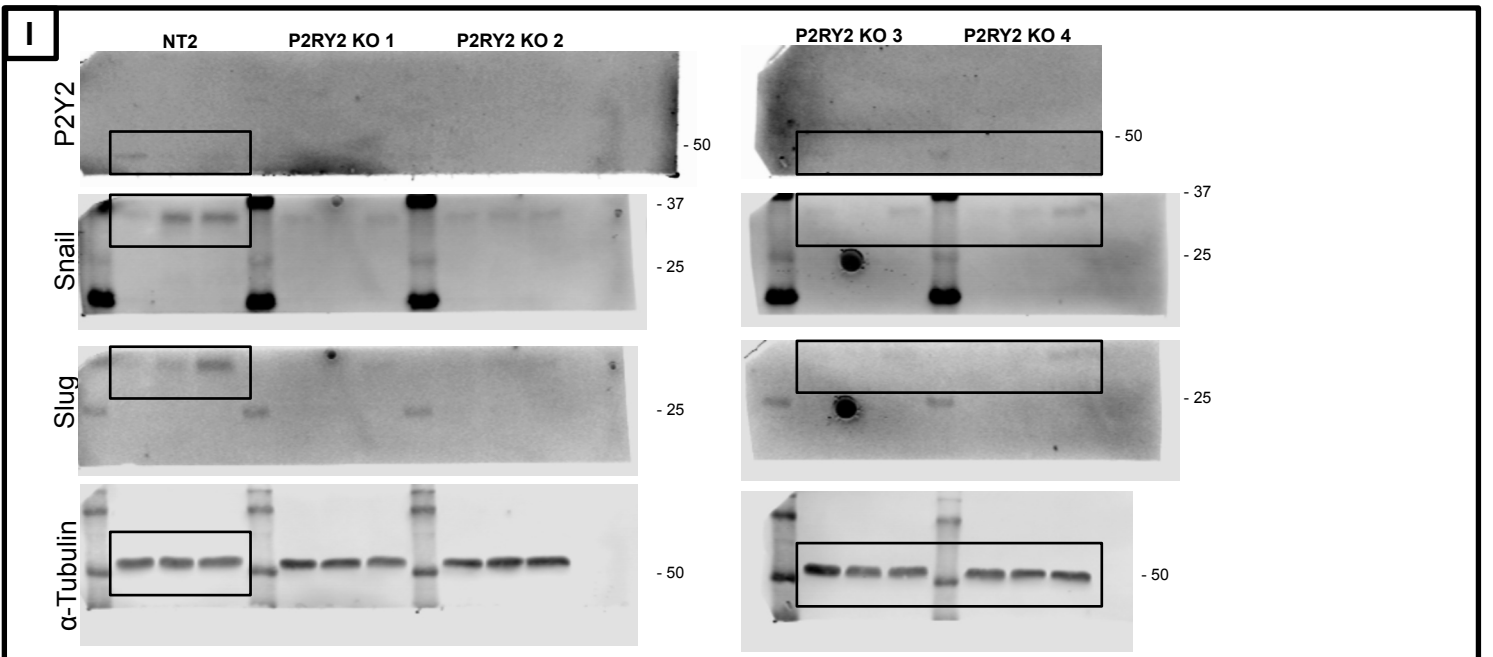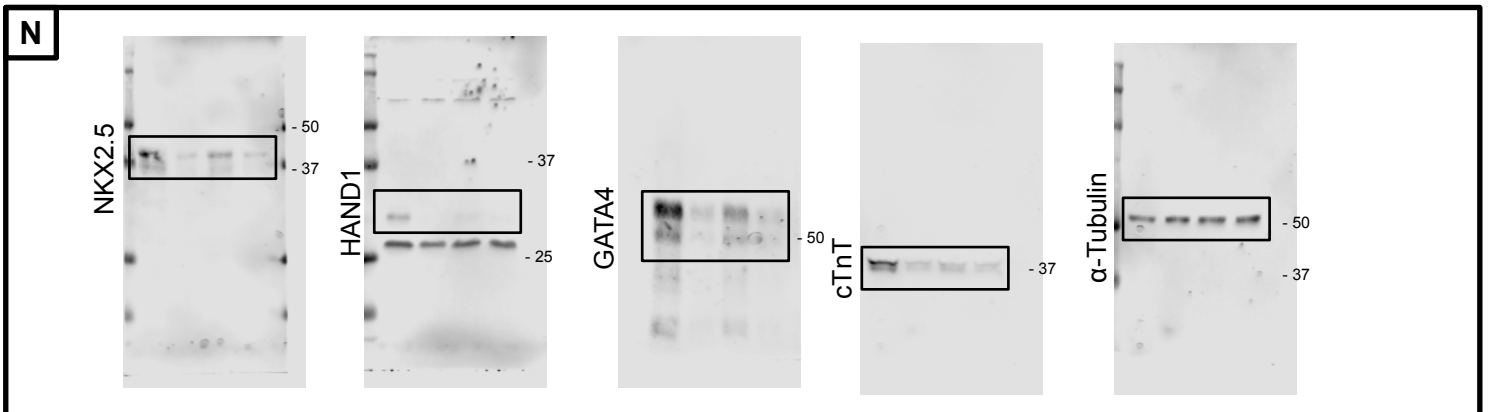

Supplement: NIHMS1786434-supplement-Unprocessed_Blots_-_Figure_8.pdf [file NIHMS1786434-supplement-Unprocessed_Blots_-_Figure_8.pdf]
